# Supplementary material for: The Interplay Between the Genetic and Immune Landscapes of AML: Mechanisms and Implications for Risk Stratification and Therapy
Source: PubMed Central journal article supplement (PMC6856667; doi:10.3389/fonc.2019.01162), 2019-11-07
Supplement: Table_1.pdf [file Table_1.pdf]

| Class            | Therapeutic                                                   | Immune Effect                                                                                       |
|------------------|---------------------------------------------------------------|-----------------------------------------------------------------------------------------------------|
| <b>Biologics</b> | Checkpoint inhibitors                                         | Block inhibitory signal of T cell activation --> Reinvigorate T cell cytotoxic activity.            |
|                  | Anti-CD38                                                     | Induce Antibody & Complement-dependent cellular cytotoxicity (ADCC) by immune cells                 |
|                  | IL2 (alone or as part of immunocytokine) +/- cellular therapy | Stimulate NK cells, macrophages, neutrophils and anti-tumor T cell response                         |
|                  | Peptide(s) vaccines +/- adjuvant or HMA                       | Elicit antigen-specific T-cell immunity                                                             |
|                  | anti-CXCR4 antibody                                           | Induce Antibody & Complement-dependent cellular cytotoxicity by immune cells                        |
| <b>Cellular</b>  | Allogeneic Dendritic cells                                    | Restore antigen presenting function of DC to innate and adaptive immune cells                       |
|                  | Autologous Dendritic cell vaccines                            | Restore antigen presenting function of DC to innate and adaptive immune cells                       |
| <b>Adoptive</b>  | Allogeneic Wilms Tumor (WT1) CTL                              | Antigen-specific cytolytic activity against WT1-expressing leukemia                                 |
|                  | Allogeneic NK cells                                           | Non-MHC recognition and tumor cell killing                                                          |
| <b>Targeted</b>  | NKR-2 CAR T-cells                                             | Recognition of stress ligands through NK cell receptor (NKR-2), direct killing and immunomodulation |
|                  | anti-CD123 or anti-CD33 CAR T-cells                           | Direct killing of antigen expressing cells                                                          |
|                  | DNMT inhibitors/Hypomethylating Agents                        | Enhanced immunogenicity of leukemia cells, decreased Treg                                           |
| <b>Therapies</b> | All-trans retinoic acid (ATRA)                                | Dendritic cell maturation. Adjuvant promoting tumor-specific T cell immunity.                       |
|                  | Oxidative Phosphorylation Inhibitor                           | Immunomodulation of OXPHOS dependent immune cell subsets                                            |

*Table 1: Approved and investigational immunomodulatory agents that are being studied alone or as part of combination therapy in clinical trials.*
